# Supplementary material for: A novel prediction tool for mortality in patients with acute lower gastrointestinal bleeding requiring emergency hospitalization: a large multicenter study
Source: PubMed Central journal article supplement (PMC10912311; doi:10.1038/s41598-024-55889-7), 2024-03-04
Supplement: 41598_2024_55889_MOESM1_ESM.pdf [file 41598_2024_55889_MOESM1_ESM.pdf]

**Supplementary Table 1. Affiliations, ethics committee approval number, and number of cases at the 49 participating hospitals in the CODE BLUE J-study**

| <b>No.</b> | <b>Prefecture</b> | <b>Institutions</b>                                | <b>Department</b>                                                                                   | <b>Ethics committee approval number</b> |
|------------|-------------------|----------------------------------------------------|-----------------------------------------------------------------------------------------------------|-----------------------------------------|
| 1          | Tokyo             | Tokyo Medical University                           | Department of Gastroenterological Endoscopy                                                         | T20190244                               |
| 2          | Tokyo             | National Center for Global Health and Medicine     | Department of Gastroenterology and Hepatology                                                       | 3539                                    |
| 3          | Tokyo             | Tokyo Shinagawa Hospital                           | Department of Gastroenterology                                                                      | 20-A-04                                 |
| 4          | Tokyo             | Nippon Medical School, Graduate School of Medicine | Department of Gastroenterology                                                                      | B-2020-147                              |
| 5          | Chiba             | Chiba Hokusoh Hospital, Nippon Medical School      | Department of Gastroenterology                                                                      | 802                                     |
| 6          | Saga              | Saga-Ken Medical Centre Koseikan                   | Department of Gastroenterology                                                                      | 20-01-01-03                             |
| 7          | Tokyo             | St. Luke's International University                | Department of Gastroenterology                                                                      | 20-R012                                 |
| 8          | Okayama           | Kawasaki Medical School                            | Division of Endoscopy and Ultrasonography, Department of Clinical Pathology and Laboratory Medicine | 3890                                    |
| 9          | Okayama           | Kawasaki Medical School General Medical Center     | Division of Endoscopy and Ultrasonography, Department of Clinical Pathology and Laboratory Medicine | 3890                                    |
| 10         | Ibaraki           | University of Tsukuba                              | Department of Gastroenterology and Division of Endoscopic Center                                    | R02-030                                 |
| 11         | Tokyo             | Tokyo Metropolitan Bokutoh Hospital                | Department of Gastroenterology                                                                      | 02-024                                  |
| 12         | Kanagawa          | Saiseikai Yokohamashi Tobu Hospital                | Emergency and Critical Care Center                                                                  | 20200030                                |
| 13         | Tokyo             | The University of Tokyo                            | Department of Gastroenterology                                                                      | 2020067NI                               |
| 14         | Tokyo             | Toranomon Hospital                                 | Department of Gastroenterology                                                                      | 2021                                    |

|    |           |                                                                        |                                                                                                              |             |
|----|-----------|------------------------------------------------------------------------|--------------------------------------------------------------------------------------------------------------|-------------|
| 15 | Aichi     | Nagoya University Hospital                                             | Department of Endoscopy                                                                                      | 2020-0152   |
| 16 | Hiroshima | Hiroshima City Asa Citizens Hospital                                   | Department of Gastroenterology                                                                               | 02-1-24     |
| 17 | Fukuoka   | National Hospital Organization<br>Fukuokahigashi Medical Center        | Department of Gastroenterology and<br>Hepatology                                                             | 2020-臨-2    |
| 18 | Nara      | Nara City Hospital                                                     | Department of Gastroenterology and<br>Hepatology and Center for Digestive and<br>Liver Diseases              | NCH 倫 20-8  |
| 19 | Niigata   | Graduate School of Medical and Dental<br>Sciences, Niigata University  | Division of Gastroenterology                                                                                 | 2020-0052   |
| 20 | Kanagawa  | St. Marianna University School of<br>Medicine                          | Division of Gastroenterology and Hepatology,<br>Department of Internal Medicine                              | 4802        |
| 21 | Oita      | Oita University                                                        | Department of Gastroenterology                                                                               | 1845        |
| 22 | Tokyo     | Tokyo Saiseikai Central Hospital                                       | Department of Internal Medicine                                                                              | 2020-015-01 |
| 23 | Fukuoka   | Fukuoka University Hospital                                            | Department of Gastroenterological<br>Endoscopy                                                               | U20-05-016  |
| 24 | Fukuoka   | Fukuoka University Chikushi Hospital                                   | Department of Gastroenterology                                                                               | C20-052     |
| 25 | Osaka     | Kitano Hospital, Tazuke Kofukai<br>Medical Research Institute          | Department of Gastroenterology and<br>Hepatology                                                             | P200500400  |
| 26 | Fukuoka   | Graduate School of Medical Sciences,<br>Kyushu University              | Department of Medicine and Clinical Science                                                                  | 2020-289    |
| 27 | Miyazaki  | University of Miyazaki Hospital                                        | Department of Gastroenterology and<br>Hepatology, Center for Digestive Disease,<br>and Division of Endoscopy | 0-0734      |
| 28 | Okinawa   | University of the Ryukyus Hospital                                     | Department of Endoscopy                                                                                      | 1656        |
| 29 | Okinawa   | Naha City Hospital                                                     | Department of Gastroenterology                                                                               | 2004a4      |
| 30 | Kagoshima | Kagoshima University Graduate School<br>of Medical and Dental Sciences | Digestive and Lifestyle Diseases                                                                             | 200041 疫    |
| 31 | Kagoshima | Kagoshima City Hospital                                                | Department of Gastroenterology                                                                               | 2020-25     |
| 32 | Kagoshima | Kagoshima Kouseiren Hospital                                           | Department of Gastroenterology                                                                               | 215         |

|    |           |                                                                                  |                                                  |             |
|----|-----------|----------------------------------------------------------------------------------|--------------------------------------------------|-------------|
| 33 | Kagoshima | Kagoshima Medical Center                                                         | Department of Gastroenterology                   | 2020-22     |
| 34 | Kagoshima | Izumi General Medical Center                                                     | Department of Gastroenterology                   | 60          |
| 35 | Kagoshima | Kirishima City Medical Association<br>Medical Center                             | Department of Gastroenterology                   | 202005      |
| 36 | Kagoshima | Kagoshima Prefectural Oshima Hospital                                            | Department of Gastroenterology                   | 97          |
| 37 | Kyoto     | National Hospital Organization Kyoto<br>Medical Center                           | Department of Gastroenterology                   | 20-020      |
| 38 | Fukushima | Fukushima Medical University                                                     | Department of Gastroenterology                   | 一般 2020-112 |
| 39 | Tokyo     | Tokyo Metropolitan Cancer and<br>Infectious Diseases Center Komagome<br>Hospital | Department of Gastroenterology                   | 2503        |
| 40 | Kanagawa  | Kitasato University, School of Medicine                                          | Department of Gastroenterology                   | C20-174     |
| 41 | Osaka     | Suita Municipal Hospital                                                         | Department of Gastroenterology and<br>Hepatology | 2020-研 2    |
| 42 | Akita     | Akita University Graduate School of<br>Medicine                                  | Department of Gastroenterology and<br>Neurology  | 2491        |
| 43 | Shizuoka  | Japanese Red Cross Shizuoka Hospital                                             | Department of Gastroenterology                   | 2020-06     |
| 44 | Aomori    | Hirosaki University Hospital                                                     | Division of Endoscopy                            | 2020-32     |
| 45 | Kumamoto  | Graduate School of Medical Sciences,<br>Kumamoto University                      | Department of Gastroenterology and<br>Hepatology | 2040        |
| 46 | Fukuoka   | National Hospital Organization Kyushu<br>Medical Center                          | Department of Gastroenterology                   | 20C065      |
| 47 | Iwate     | Iwate Medical University                                                         | Department of Internal Medicine                  | MH2020-050  |
| 48 | Yamaguchi | Shuto General Hospital                                                           | Department of Gastroenterology                   | H31-24      |
| 49 | Saitama   | National Defense Medical College                                                 | Department of Internal Medicine                  | 4217        |

**Supplementary Table 2. The list of predictors for 30-day and 1-year mortality scores in patients with acute hematochezia**

| <b>Variables</b>                        | <b>30-day mortality score</b> | <b>1-year mortality score</b> | <b>Evidence of cut-off value</b> |
|-----------------------------------------|-------------------------------|-------------------------------|----------------------------------|
| Age $\geq$ 70 y                         | <input type="radio"/>         | <input type="radio"/>         | Reference No. 5                  |
| Sex (male)                              | <input type="radio"/>         | <input type="radio"/>         |                                  |
| BMI $\leq$ 18.5                         | <input type="radio"/>         | <input type="radio"/>         | Reference No. 5                  |
| Current drinker                         | <input type="radio"/>         | <input type="radio"/>         |                                  |
| Current smoker                          | <input type="radio"/>         | <input type="radio"/>         |                                  |
| Performance status $\geq$ 2             | <input type="radio"/>         | <input type="radio"/>         | Reference No. 20                 |
| Hemodynamics                            |                               |                               |                                  |
| Systolic blood pressure $\leq$ 100 mmHg | <input type="radio"/>         | <input type="radio"/>         | Reference No. 2                  |
| Heart rate $\geq$ 100/min               | <input type="radio"/>         | <input type="radio"/>         | Reference No. 2                  |
| Symptom                                 |                               |                               |                                  |

Altered mental status

Abdominal pain

Diarrhea

Laboratory data

Hemoglobin < 12 g/dL   Reference No. 21

WBC > 10000/mm<sup>3</sup>   Reference No. 21

Platelet count < 150000/mm<sup>3</sup>   Reference No. 2

Albumin level > 3.0 g/dL   Reference No. 2

INR ≥ 1.5   Reference No. 2

Hematocrit ≤ 35%   Calculated from hemoglobin values

BUN ≥ 25 mg/dL   Reference No. 21

Creatinine ≥ 1.5 mg/dL   Reference No. 2

CRP ≥ 1.0 mg/dL   Reference No. 22

Home medication

Low-dose aspirin

Antiplatelet drug (non-aspirin)

Warfarin

Direct oral anticoagulant

NSAIDs

Acetaminophen

Corticosteroid

Comorbidity

Previous diverticular bleeding

Hypertension

Dyslipidemia

Diabetes mellitus

|                                       |                       |                       |
|---------------------------------------|-----------------------|-----------------------|
| Diabetes complication                 | <input type="radio"/> | <input type="radio"/> |
| Hemiplegia                            | <input type="radio"/> | <input type="radio"/> |
| Cerebrovascular disease               | <input type="radio"/> | <input type="radio"/> |
| Chronic obstructive pulmonary disease | <input type="radio"/> | <input type="radio"/> |
| Dementia                              | <input type="radio"/> | <input type="radio"/> |
| Collagen disease                      | <input type="radio"/> | <input type="radio"/> |
| Ischemic heart disease                | <input type="radio"/> | <input type="radio"/> |
| Heart failure                         | <input type="radio"/> | <input type="radio"/> |
| Previous peptic ulcer                 | <input type="radio"/> | <input type="radio"/> |
| Renal failure                         | <input type="radio"/> | <input type="radio"/> |
| Peripheral arterial disease           | <input type="radio"/> | <input type="radio"/> |
| Chronic hepatitis                     | <input type="radio"/> | <input type="radio"/> |
| Cirrhosis                             | <input type="radio"/> | <input type="radio"/> |

|                                                              |                       |                       |
|--------------------------------------------------------------|-----------------------|-----------------------|
| Blood malignancy and nonmetastatic solid cancer <sup>a</sup> | <input type="radio"/> | <input type="radio"/> |
| Metastatic cancer                                            | <input type="radio"/> | <input type="radio"/> |
| Diagnostic procedure                                         |                       |                       |
| CT                                                           | -                     | <input type="radio"/> |
| Therapeutic procedures                                       |                       |                       |
| Endoscopic treatment                                         | -                     | <input type="radio"/> |
| Interventional radiology                                     | -                     | <input type="radio"/> |
| Surgery                                                      | -                     | <input type="radio"/> |
| Blood transfusion during hospitalization                     | -                     | <input type="radio"/> |
| The final diagnosis of hematochezia                          |                       |                       |
| Colonic diverticular bleeding                                | -                     | <input type="radio"/> |
| Rectal ulcer                                                 | -                     | <input type="radio"/> |



|                                       |   |                       |                  |
|---------------------------------------|---|-----------------------|------------------|
| Angioectasia                          | - | <input type="radio"/> |                  |
| Upper gastrointestinal bleeding       | - | <input type="radio"/> |                  |
| Small intestinal bleeding             | - | <input type="radio"/> |                  |
| Malignancy                            | - | <input type="radio"/> |                  |
| Others                                | - | <input type="radio"/> |                  |
| In-hospital outcomes                  |   |                       |                  |
| Length of hospital stay $\geq$ 8 days | - | <input type="radio"/> | Reference No. 21 |
| Rebleeding during hospitalization     | - | <input type="radio"/> |                  |
| Thromboembolism                       | - | <input type="radio"/> |                  |

---

Abbreviations: BMI, body mass index; BUN, blood urea nitrogen; CI, confidence interval; CRP, C-reactive protein; CT, computed tomography; INR, international normalized ratio; NSAIDs, nonsteroidal anti-inflammatory drugs; WBC, white blood cell count.

<sup>a</sup> Blood malignancy was included with the comorbidity of leukemia and lymphoma.

**Supplementary Table 3. Characteristics of patients enrolled in predicting 1-year mortality in the derivation cohort and the validation cohort (n = 6,084)**

| Characteristics                         | Patients, no. (%)                |                                  | P value <sup>a</sup> | Missing values |
|-----------------------------------------|----------------------------------|----------------------------------|----------------------|----------------|
|                                         | derivation cohort<br>(n = 4,030) | Validation cohort<br>(n = 2,054) |                      |                |
| Age ≥ 70 y                              | 2,446 (60.7)                     | 1,232 (60.0)                     | 0.598                | 0              |
| Sex (male)                              | 3,675 (60.4)                     | 2,445 (60.7)                     | 0.561                | 0              |
| BMI ≤ 18.5                              | 500 (13.1)                       | 235 (12.1)                       | 0.297                | 114 (5.6)      |
| Current drinker                         | 1,629 (46.7)                     | 811 (46.1)                       | 0.703                | 296 (14.4)     |
| Current smoker                          | 673 (18.6)                       | 325 (18.0)                       | 0.603                | 248 (12.1)     |
| Performance status ≥ 2                  | 455 (11.5)                       | 225 (11.1)                       | 0.667                | 20 (1.0)       |
| Hemodynamics                            |                                  |                                  |                      |                |
| Systolic blood pressure ≤ 100 mmHg      | 540 (13.7)                       | 274 (13.6)                       | 0.968                | 39 (1.9)       |
| Heart rate ≥ 100/min                    | 791 (20.1)                       | 401 (20.0)                       | 0.945                | 47 (2.3)       |
| Symptom                                 |                                  |                                  |                      |                |
| Altered mental status                   | 247 (6.1)                        | 141 (6.9)                        | 0.292                | 1 (0.0)        |
| Abdominal pain                          | 751 (18.7)                       | 368 (17.9)                       | 0.506                | 2 (0.1)        |
| Diarrhea                                | 463 (11.5)                       | 233 (11.4)                       | 0.865                | 4 (0.2)        |
| Laboratory data                         |                                  |                                  |                      |                |
| Hemoglobin < 12 g/dL                    | 2,381 (59.1)                     | 1,175 (57.3)                     | 0.169                | 2 (0.1)        |
| WBC > 10000/mm <sup>3</sup>             | 844 (21.0)                       | 430 (20.9)                       | 1.000                | 1 (0.0)        |
| Platelet count < 150000/mm <sup>3</sup> | 653 (16.2)                       | 289 (14.1)                       | <b>0.030</b>         | 1 (0.0)        |
| Albumin level < 3.0 g/dL                | 478 (12.4)                       | 212 (10.8)                       | 0.072                | 94 (4.6)       |
| INR ≥ 1.5                               | 341 (9.7)                        | 181 (10.2)                       | 0.591                | 275 (13.4)     |
| Hematocrit ≤ 35%                        | 2,214 (55.1)                     | 1,103 (53.9)                     | 0.398                | 7 (0.3)        |
| BUN ≥ 25 mg/dL                          | 1,066 (26.6)                     | 500 (24.6)                       | 0.093                | 20 (1.0)       |

|                                       |              |              |              |          |
|---------------------------------------|--------------|--------------|--------------|----------|
| Creatinine $\geq$ 1.5 mg/dL           | 521 (13.0)   | 251 (12.4)   | 0.488        | 22 (1.1) |
| CRP $\geq$ 1.0 mg/dL                  | 3,114 (77.3) | 1,608 (78.3) | 0.380        | 57 (2.8) |
| Home medication                       |              |              |              |          |
| Low-dose aspirin                      | 849 (21.1)   | 414 (20.2)   | 0.423        | 0        |
| Antiplatelet drug (non-aspirin)       | 575 (14.3)   | 309 (15.0)   | 0.419        | 0        |
| Warfarin                              | 300 (7.4)    | 164 (8.0)    | 0.475        | 0        |
| Direct oral anticoagulant             | 253 (6.3)    | 110 (5.4)    | 0.153        | 0        |
| NSAIDs                                | 484 (12.0)   | 237 (11.5)   | 0.615        | 0        |
| Acetaminophen                         | 94 (2.3)     | 51 (2.5)     | 0.723        | 0        |
| Corticosteroid                        | 238 (5.9)    | 134 (6.5)    | 0.337        | 0        |
| Comorbidity                           |              |              |              |          |
| Previous diverticular bleeding        | 601 (14.9)   | 340 (16.6)   | 0.099        | 1 (0.0)  |
| Hypertension                          | 2,217 (55.0) | 1,146 (55.8) | 0.567        | 0        |
| Dyslipidemia                          | 1,092 (27.1) | 534 (26.0)   | 0.374        | 0        |
| Diabetes mellitus                     | 809 (20.1)   | 364 (17.7)   | <b>0.028</b> | 0        |
| Diabetes complication                 | 144 (3.6)    | 77 (3.7)     | 0.718        | 0        |
| Hemiplegia                            | 93 (2.3)     | 50 (2.4)     | 0.789        | 1 (0.0)  |
| Cerebrovascular disease               | 568 (14.1)   | 270 (13.1)   | 0.325        | 0        |
| Chronic obstructive pulmonary disease | 131 (3.3)    | 55 (2.7)     | 0.238        | 0        |
| Dementia                              | 187 (4.6)    | 97 (4.7)     | 0.898        | 1 (0.0)  |
| Collagen disease                      | 186 (4.6)    | 97 (4.7)     | 0.847        | 0        |
| Ischemic heart disease                | 642 (15.9)   | 331 (16.1)   | 0.853        | 0        |
| Heart failure                         | 338 (8.4)    | 186 (9.1)    | 0.385        | 1 (0.0)  |
| Previous peptic ulcer                 | 309 (7.7)    | 134 (6.5)    | 0.106        | 0        |
| Renal failure                         | 612 (15.2)   | 304 (14.8)   | 0.705        | 1 (0.0)  |
| Peripheral arterial disease           | 166 (4.1)    | 81 (3.9)     | 0.784        | 0        |
| Chronic hepatitis                     | 106 (2.6)    | 52 (2.5)     | 0.865        | 0        |
| Cirrhosis                             | 97 (2.3)     | 41 (2.0)     | 0.557        | 0        |

|                                                              |              |              |              |   |
|--------------------------------------------------------------|--------------|--------------|--------------|---|
| Blood malignancy and nonmetastatic solid cancer <sup>b</sup> | 628 (15.6)   | 306 (14.9)   | 0.499        | 0 |
| Metastatic cancer                                            | 113 (2.8)    | 62 (3.0)     | 0.627        | 0 |
| Diagnostic procedure                                         |              |              |              |   |
| CT                                                           | 2,735 (67.9) | 1,466 (71.4) | <b>0.005</b> | 0 |
| Therapeutic procedures                                       |              |              |              |   |
| Endoscopic treatment                                         | 1,323 (32.8) | 673 (32.8)   | 0.977        | 0 |
| Interventional radiology                                     | 79 (2.0)     | 40 (1.9)     | 1.000        | 0 |
| Surgery                                                      | 80 (2.0)     | 26 (1.3)     | <b>0.049</b> | 0 |
| Blood transfusion during hospitalization                     | 1,243 (30.8) | 616 (30.0)   | 0.499        | 0 |
| Final diagnosis of hematochezia                              |              |              |              |   |
| Colonic diverticular bleeding                                | 2,352 (58.4) | 1,223 (59.5) | 0.378        | 0 |
| Rectal ulcer                                                 | 96 (2.4)     | 54 (2.6)     | 0.600        | 0 |
| Angioectasia                                                 | 66 (1.6)     | 29 (1.4)     | 0.585        | 0 |
| Upper gastrointestinal bleeding                              | 74 (1.8)     | 30 (1.5)     | 0.298        | 0 |
| Small intestinal bleeding                                    | 101 (2.5)    | 51 (2.5)     | 1.000        | 0 |
| Cancer                                                       | 111 (2.8)    | 36 (1.8)     | <b>0.017</b> | 0 |
| Others                                                       | 271 (6.7)    | 148 (7.2)    | 0.487        | 0 |
| In-hospital outcomes                                         |              |              |              |   |
| Length of hospital stay $\geq$ 8 days                        | 1,975 (49.0) | 1,019 (49.6) | 0.665        | 0 |
| Rebleeding during hospitalization                            | 598 (14.8)   | 284 (13.8)   | 0.299        | 0 |
| Thromboembolism                                              | 33 (0.8)     | 10 (0.5)     | 0.194        | 0 |
| Death within 1 year                                          | 163 (4.0)    | 82 (4.0)     | 0.945        | 0 |

Abbreviations: BMI, body mass index; WBC, white blood cell count; INR, international normalized ratio; BUN, blood urea nitrogen; CRP, C-reactive protein; NSAIDs, nonsteroidal anti-inflammatory drugs; CT, computed tomography.

<sup>a</sup> Bold values indicate  $P < 0.05$ .

<sup>b</sup> Blood malignancy was included with the comorbidity of leukemia and lymphoma.

**Supplementary Table 4. Factors and scoring algorithms included in Sengupta Score, Oakland Score, NOBLADS Score, and Charlson Comorbidity Index**

| <b>Score</b>               | <b>Variable</b>        | <b>Categories</b> | <b>Points</b> |
|----------------------------|------------------------|-------------------|---------------|
| Sengupta                   | Age                    | <30 years         | -2            |
|                            |                        | 30-39 years       | -1            |
|                            |                        | 40-49 years       | 0             |
|                            |                        | 50-59 years       | 1             |
|                            |                        | 60-69 years       | 2             |
|                            |                        | 70-79 years       | 3             |
|                            |                        | 80-90 years       | 4             |
|                            |                        | >90 years         | 5             |
|                            | Dementia               | Yes               | 5             |
|                            | Chronic kidney disease | Yes               | 2             |
| Metastatic cancer          | Yes                    | 5                 |               |
| Systemic anticoagulant use | Yes                    | 1                 |               |
| Chronic pulmonary disease  | Yes                    | 2                 |               |
| Admission albumin          | <2 g/dL                | 13                |               |

|         |                                     |              |    |
|---------|-------------------------------------|--------------|----|
|         |                                     | 2–2.9 g/dL   | 7  |
|         |                                     | 3–3.9 g/dL   | 0  |
|         |                                     | ≥4 g/dL      | –7 |
| Oakland | Age                                 | 40–69 years  | 1  |
|         |                                     | ≥70 years    | 2  |
|         | Sex                                 | Male         | 1  |
|         | Previous LGIB admission             | Yes          | 1  |
|         | Digital rectal examination findings | Blood        | 1  |
|         | Heart rate                          | 70–89/min    | 1  |
|         |                                     | 90–119/min   | 2  |
|         |                                     | 120–129/min  | 3  |
|         |                                     | 130–159/min  | 2  |
|         | Systolic blood pressure             | 50–89 mmHg   | 5  |
|         |                                     | 90–109 mmHg  | 4  |
|         |                                     | 120–129 mmHg | 3  |
|         |                                     | 130–159 mmHg | 2  |

|                            |                             |              |    |
|----------------------------|-----------------------------|--------------|----|
|                            | Hemoglobin                  | 36–69 g/dL   | 22 |
|                            |                             | 70–89 g/dL   | 17 |
|                            |                             | 90–109 g/dL  | 13 |
|                            |                             | 110–129 g/dL | 8  |
|                            |                             | 130–159 g/dL | 5  |
| NOBLADS                    | NSAIDs use                  |              | 1  |
|                            | No diarrhea                 |              | 1  |
|                            | No abdominal tenderness     |              | 1  |
|                            | Systolic blood pressure     | ≤100 mmHg    | 1  |
|                            | Albumin                     | <3.0 g/dL    | 1  |
|                            | Charlson comorbidity index  | ≥2 points    | 1  |
|                            | Syncope                     |              | 1  |
| Charlson Comorbidity Index | Myocardial infarct          |              | 1  |
|                            | Congestive heart failure    |              | 1  |
|                            | Peripheral vascular disease |              | 1  |
|                            | Cerebrovascular disease     |              | 1  |
|                            | Dementia                    |              | 1  |

|                                  |   |
|----------------------------------|---|
| Connective tissue disease        | 1 |
| Ulcer disease                    | 1 |
| Mild liver disease               | 1 |
| Diabetes                         | 1 |
| Hemiplegia                       | 1 |
| Moderate or severe renal disease | 2 |
| Diabetes with end-organ damage   | 2 |
| Any tumor                        | 2 |
| Leukemia                         | 2 |
| Lymphoma                         | 2 |
| Moderate or severe liver disease | 3 |
| Metastatic solid tumor           | 6 |
| AIDS                             | 6 |

---

Abbreviations: LGIB, lower gastrointestinal bleeding; NSAIDs, nonsteroidal anti-inflammatory drugs; INR, international normalized ratio; AIDS, acquired immunodeficiency syndrome.



**Supplementary Table 5. Causes of 30-day death in patients with hematochezia in the derivation cohort (n = 5,459)**

| <b>Death within 30 days</b>                | <b>51</b>  |
|--------------------------------------------|------------|
| Bleeding-related death                     | 7 (13.7%)  |
| Non-bleeding-related death                 |            |
| Malignant disease                          | 11 (21.6%) |
| Infection                                  | 11 (21.6%) |
| Comorbidities other than malignant disease | 6 (11.8%)  |
| Onset of acute illness                     | 7 (13.7%)  |
| Unknown                                    | 9 (17.6%)  |

**Supplementary Table 6. The CACHEXIA score for 30-day and 1-year mortality in patients with acute hematochezia**

| <b>Variables</b>                                             | <b>30-day mortality score</b> | <b>1-year mortality score</b> |
|--------------------------------------------------------------|-------------------------------|-------------------------------|
| Performance status $\geq 2$                                  | 2                             | 2                             |
| Liver cirrhosis                                              | 2                             | 3                             |
| Malignancy metastasis                                        | 3                             | 3                             |
| Albumin level $< 3.0$ g/dL                                   | 2                             | 1                             |
| BUN $\geq 25$ mg/dL                                          | 1                             | 1                             |
| CRP $\geq 1.0$ mg/dL                                         | 1                             | 1                             |
| BMI $< 18.5$                                                 | –                             | 1                             |
| Blood malignancy and nonmetastatic solid cancer <sup>a</sup> | –                             | 2                             |
| Bleeding from malignancy                                     | –                             | 2                             |
| Blood transfusion during hospitalization                     | –                             | 1                             |

Abbreviations: BUN, blood urea nitrogen; CRP, C-reactive protein; BMI, body mass index.

<sup>a</sup>Blood malignancy was included with the comorbidity of leukemia and lymphoma.

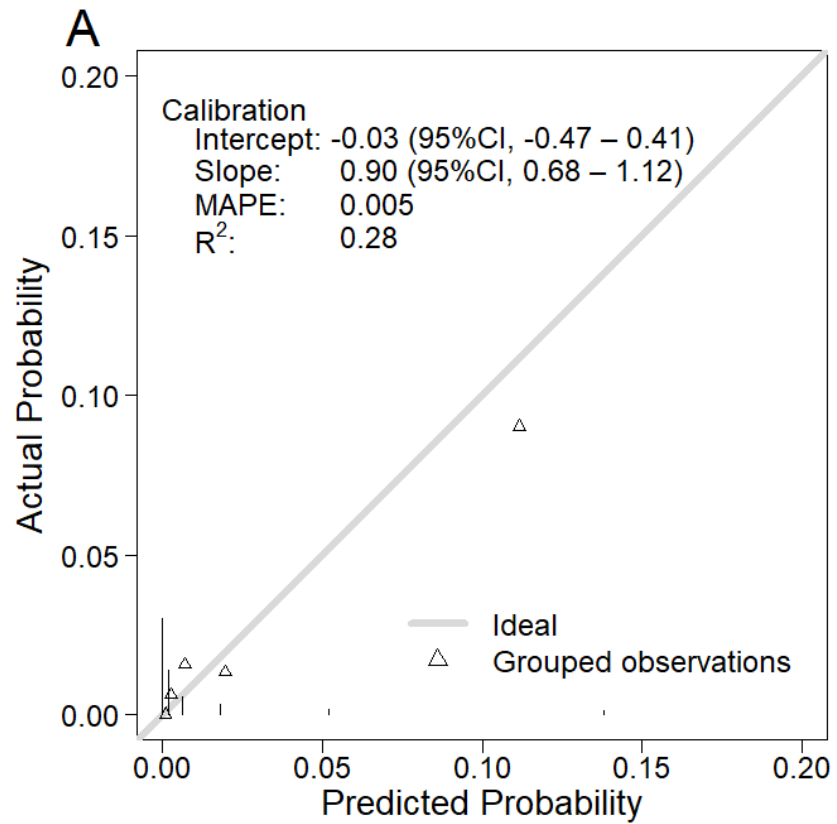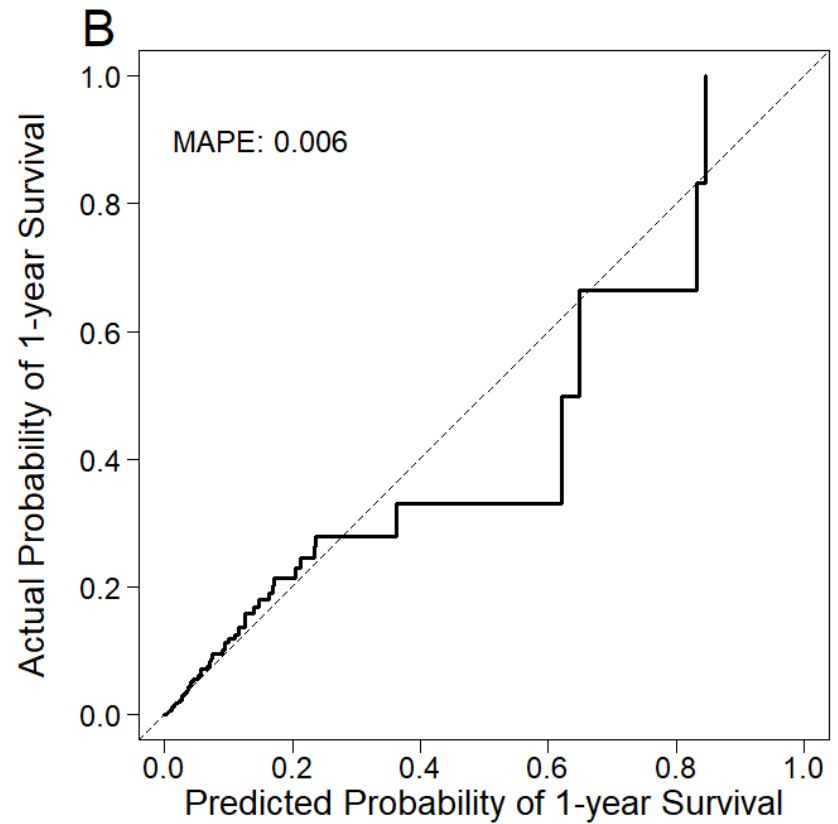

**Supplementary Figure 1**

Calibration plots and calculated mean absolute prediction errors. **(A)** Calibration plot for 30-day survival. **(B)** Calibration plot for 1-year survival. Abbreviations: MAPE, mean absolute prediction error.
